# Supplementary material
Source: HighWire-hosted journal article supplement (https://diabetes.diabetesjournals.org/content/suppl/2006/07/28/55.8.2272)

Supplementary Table 1

| Study          | Genotype | Exon 8    |           |           |           |           |           |           |           |           |           |           |           |
|----------------|----------|-----------|-----------|-----------|-----------|-----------|-----------|-----------|-----------|-----------|-----------|-----------|-----------|
|                |          | rs2076684 | rs3818092 | rs6570592 | 8498C>T   | rs1303738 | rs2064495 | rs2064661 | rs2076683 | rs2092894 | rs2247408 | rs2257104 | rs2268447 |
| YT2D           | 11       | 1         | 15        | 59        | 13        | 226       | 172       | 180       | 43        | 89        | 32        | 90        | 32        |
|                | 12       | 29        | 92        | 151       | 70        | 43        | 96        | 77        | 144       | 125       | 118       | 133       | 115       |
|                | 22       | 166       | 165       | 68        | 192       | 0         | 7         | 12        | 78        | 49        | 127       | 50        | 124       |
|                | 11       | 0         | 20        | 110       | 16        | 417       | 332       | 321       | 115       | 162       | 58        | 184       | 58        |
| W2<br>Probands | 12       | 44        | 193       | 261       | 129       | 111       | 185       | 175       | 267       | 252       | 225       | 262       | 237       |
|                | 22       | 188       | 320       | 164       | 392       | 0         | 19        | 20        | 140       | 90        | 252       | 91        | 247       |
|                | 11       | 5         | 48        | 249       | 29        | 879       | 713       | 774       | 212       | 315       | 76        | 345       | 82        |
| W2<br>Cases    | 12       | 176       | 387       | 543       | 304       | 220       | 350       | 295       | 543       | 543       | 493       | 527       | 509       |
|                | 22       | 879       | 660       | 322       | 783       | 0         | 47        | 31        | 343       | 232       | 543       | 213       | 533       |
|                | 11       | 5         | 29        | 63        | 12        | 333       | 278       | 306       | 94        | 125       | 39        | 138       | 41        |
| ECCAC          | 12       | 76        | 142       | 151       | 121       | 104       | 146       | 122       | 205       | 234       | 183       | 219       | 184       |
|                | 22       | 313       | 252       | 115       | 311       | 0         | 26        | 20        | 143       | 85        | 226       | 83        | 225       |
|                | 11       | 0         | 59        | 246       | 30        | 903       | 702       | 731       | 186       | 329       | 110       | 344       | 118       |
| EFS<br>Parents | 12       | 186       | 387       | 593       | 280       | 230       | 387       | 328       | 575       | 537       | 498       | 610       | 505       |
|                | 22       | 901       | 649       | 303       | 835       | 0         | 47        | 29        | 321       | 222       | 537       | 185       | 522       |
| Study          | Genotype | rs2273323 | rs2328536 | rs6937128 | rs7761382 |           |           |           |           |           |           |           |           |
| YT2D           | 11       | 0         |           | 127       | 25        | 80        |           |           |           |           |           |           |           |
|                | 12       | 27        |           | 114       | 96        | 135       |           |           |           |           |           |           |           |
|                | 22       | 237       |           | 34        | 142       | 39        |           |           |           |           |           |           |           |
|                | 11       | 1         |           | 247       | 30        | 162       |           |           |           |           |           |           |           |
| W2<br>Probands | 12       | 63        |           | 234       | 178       | 252       |           |           |           |           |           |           |           |
|                | 22       | 458       |           | 59        | 312       | 108       |           |           |           |           |           |           |           |
|                | 11       | 3         |           | 533       | 72        | 369       |           |           |           |           |           |           |           |
| W2 Cases       | 12       | 124       |           | 507       | 388       | 536       |           |           |           |           |           |           |           |
|                | 22       | 974       |           | 81        | 622       | 198       |           |           |           |           |           |           |           |
|                | 11       | 3         |           | 224       | 26        | 146       |           |           |           |           |           |           |           |
| ECCAC          | 12       | 44        |           | 183       | 171       | 210       |           |           |           |           |           |           |           |
|                | 22       | 399       |           | 41        | 249       | 85        |           |           |           |           |           |           |           |
|                | 11       | 1         |           | 524       | 77        | 343       |           |           |           |           |           |           |           |
| EFS<br>Parents | 12       | 125       |           | 508       | 382       | 570       |           |           |           |           |           |           |           |
|                | 22       | 963       |           | 117       | 621       | 174       |           |           |           |           |           |           |           |

# Supplementary Figure 1

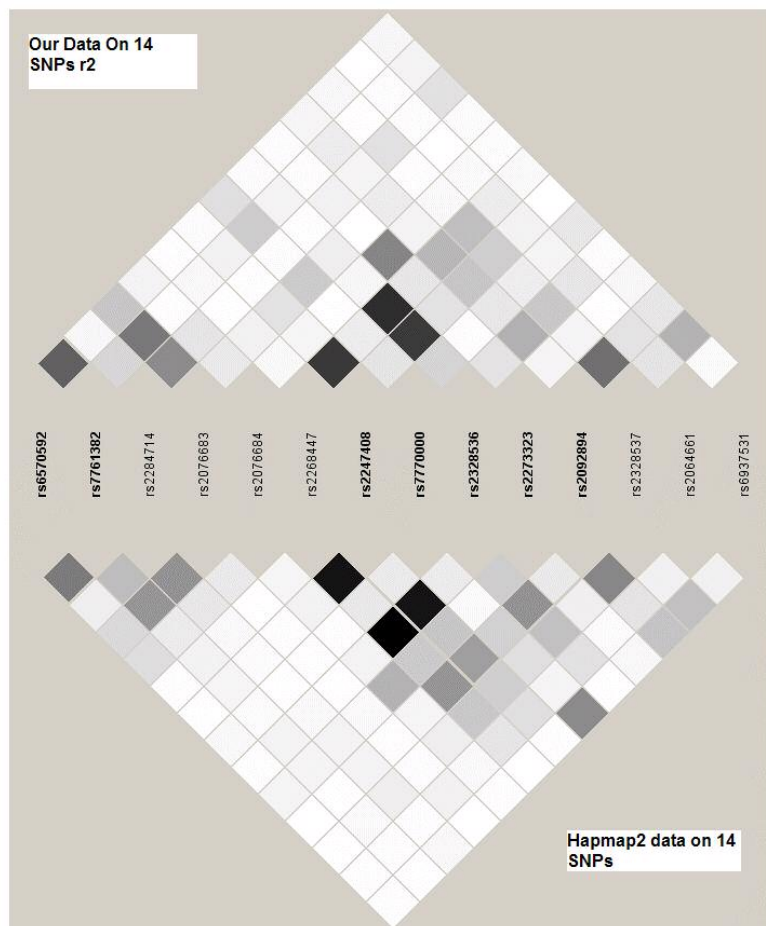

Supplement: PG2272OnlineAppendix.pdf [file PG2272OnlineAppendix.pdf]
